# Supplementary material
Source: publisher figshare collection journal article supplement (https://acs.figshare.com/ndownloader/files/4048354)
Supplement: Supplementary file 1 [file 4048354]

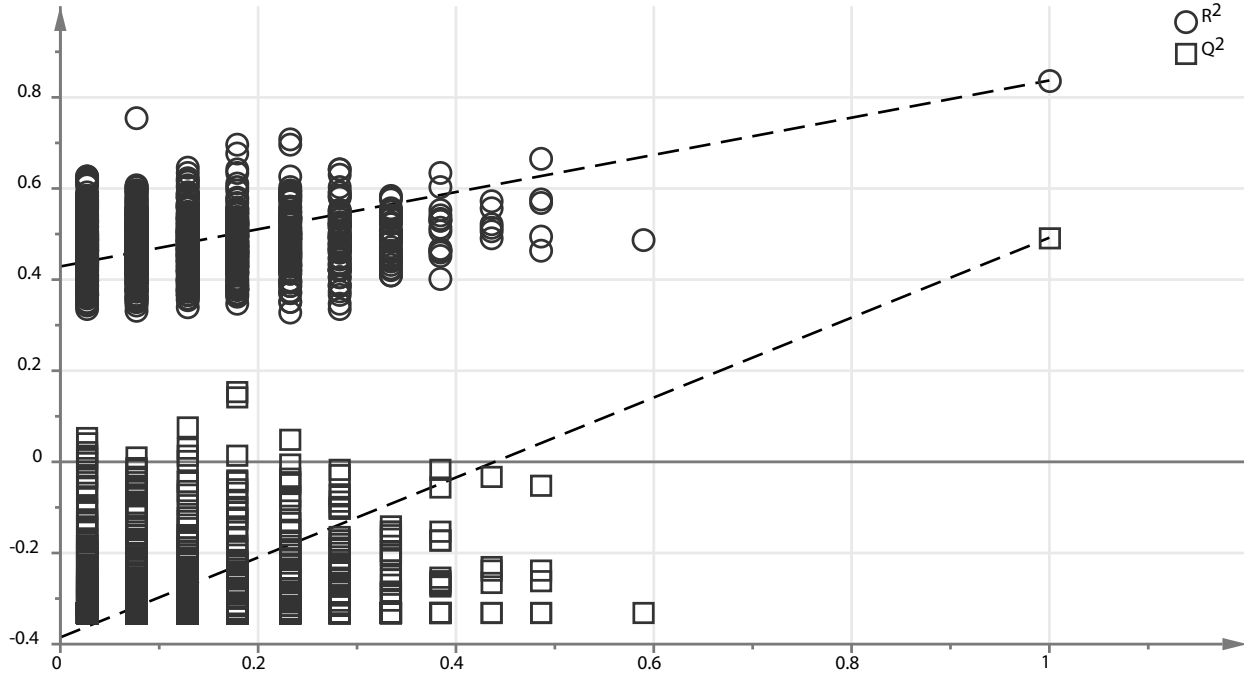

999 permutations 3 components  
 $R^2=(0.0, 0.429)$ ,  $Q^2=(0.0, -0.385)$

Figure S1

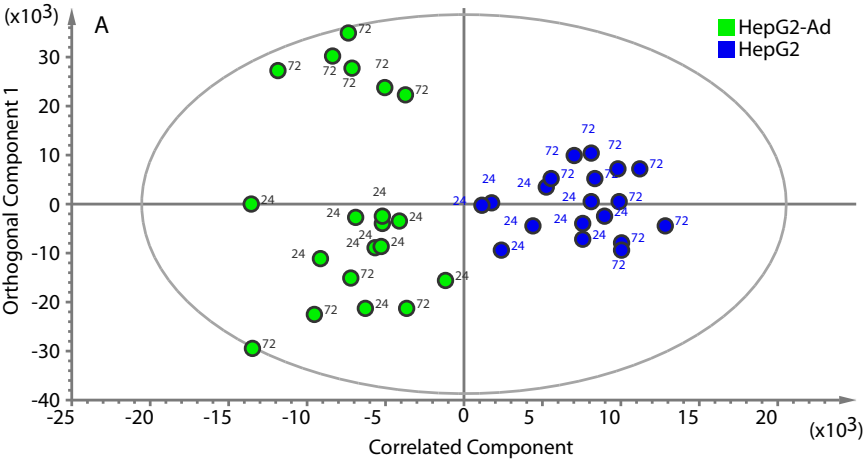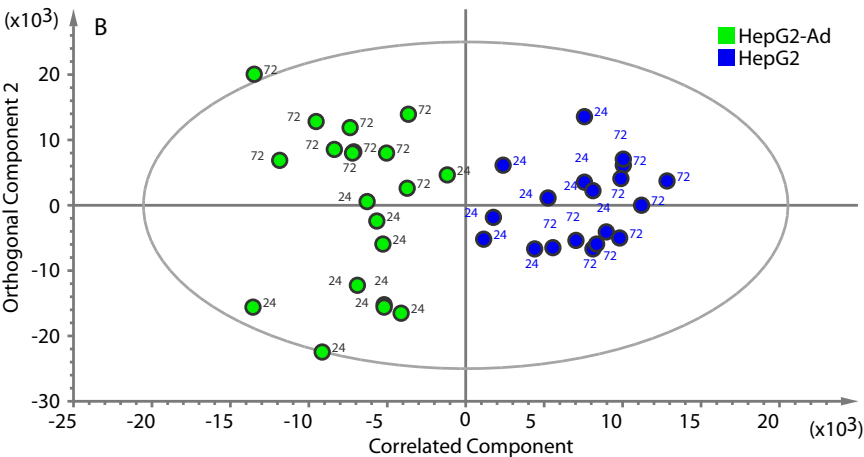

Figure S2

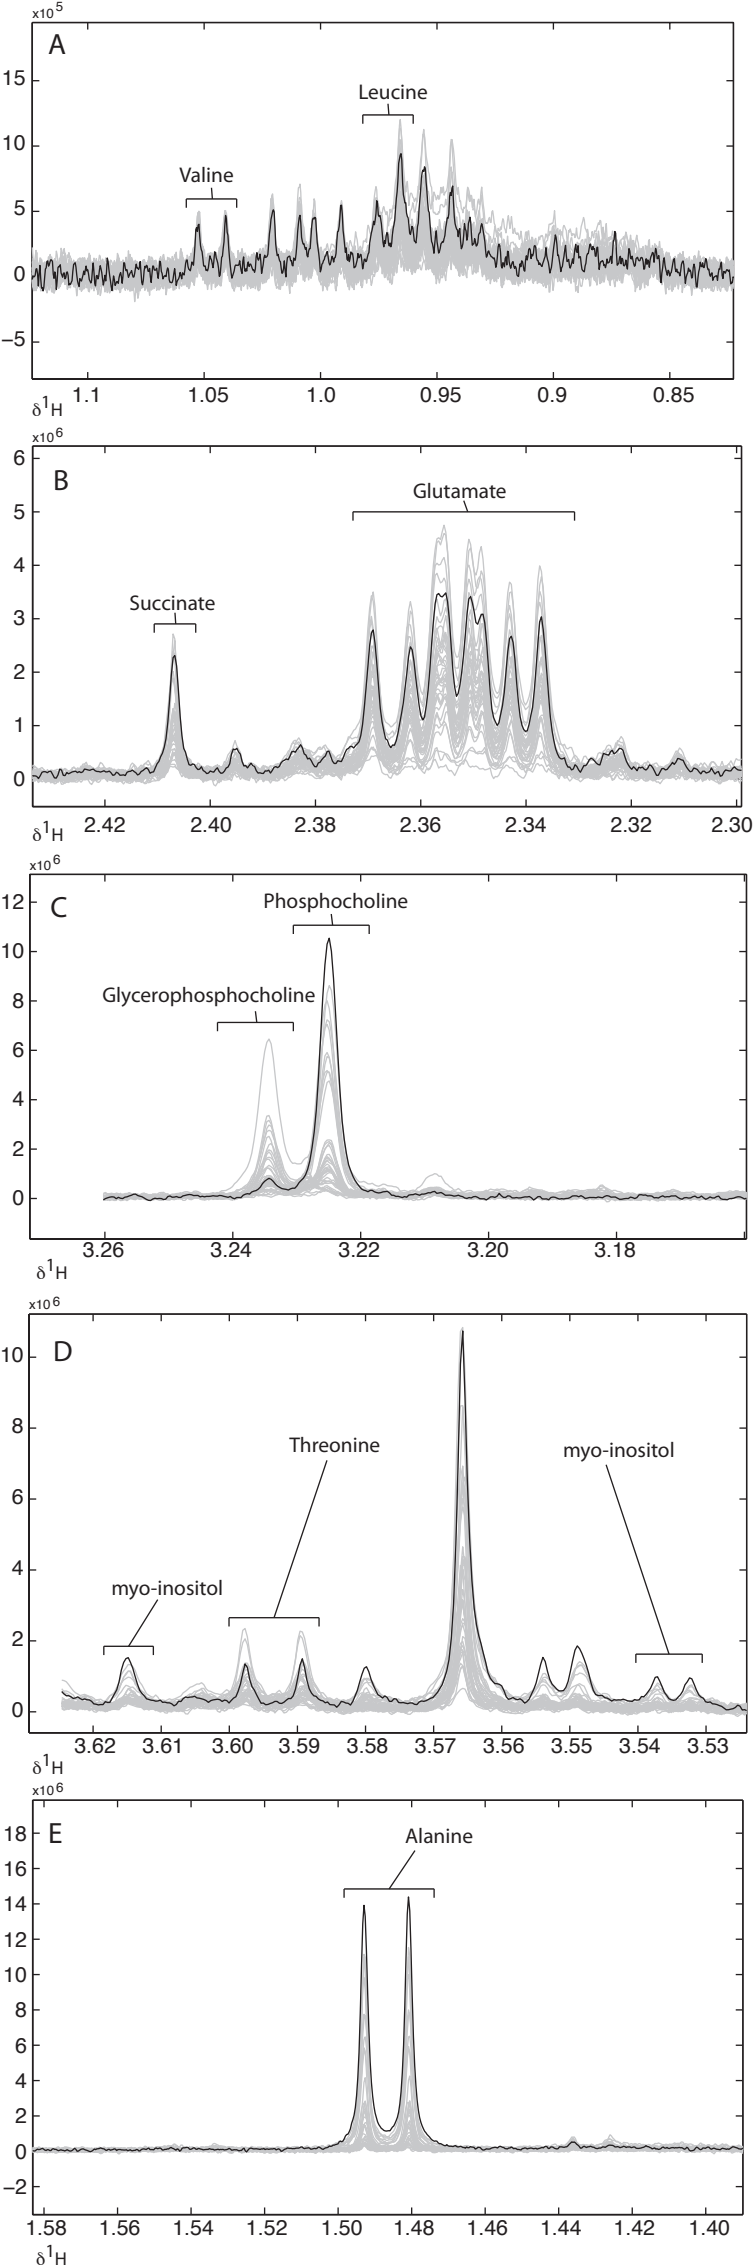

Figure S3

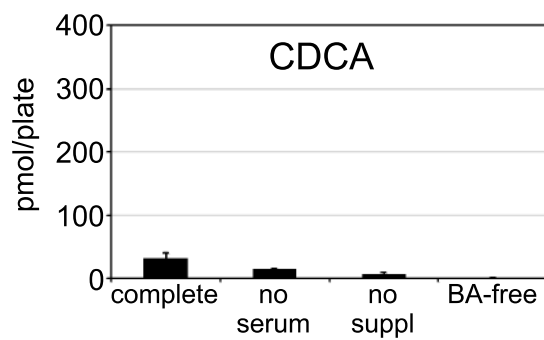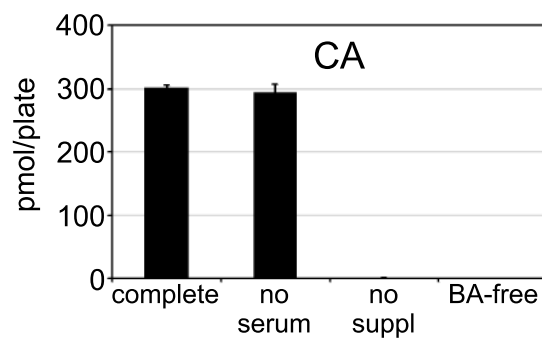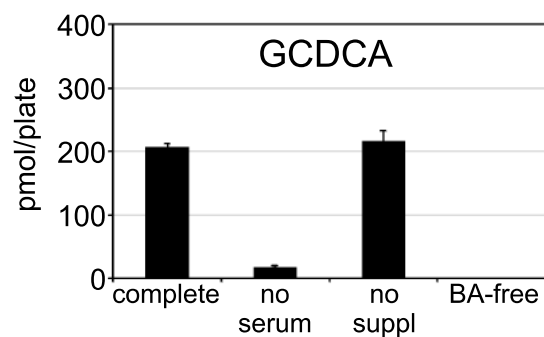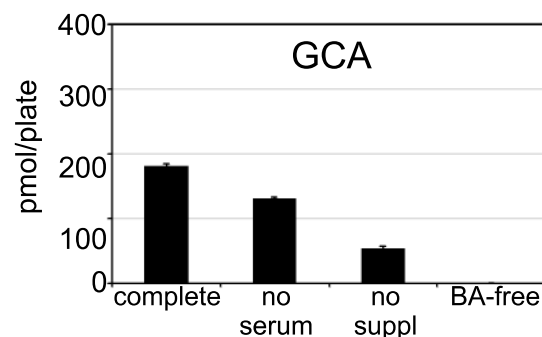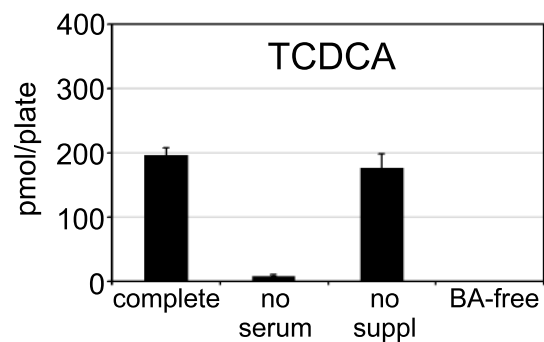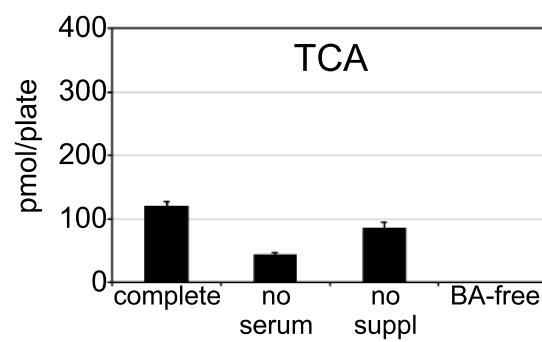

FIGURE S4

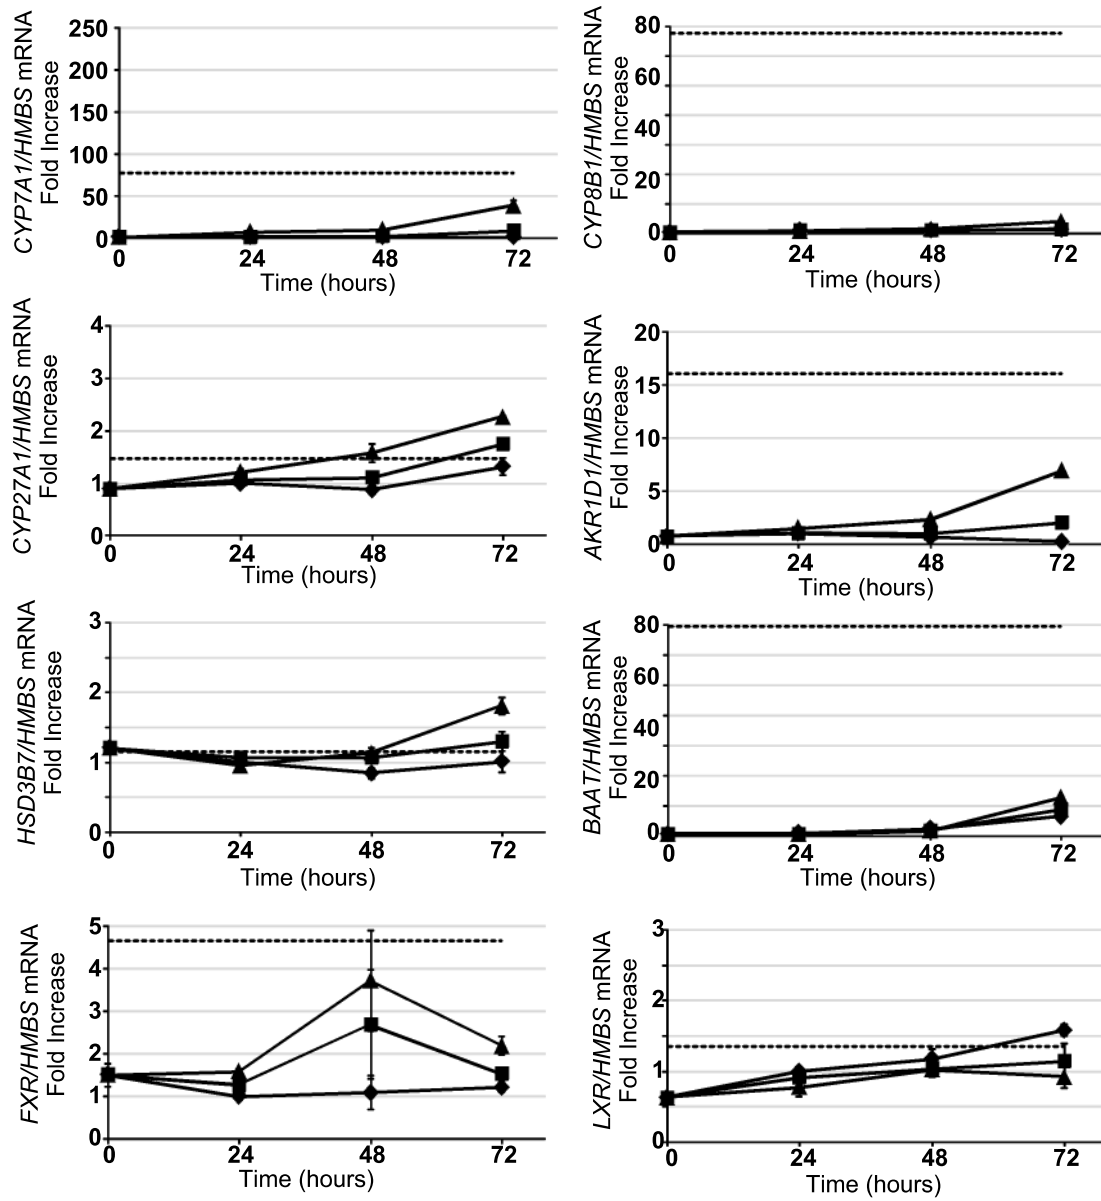

FIGURE S5

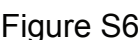

Figure S6

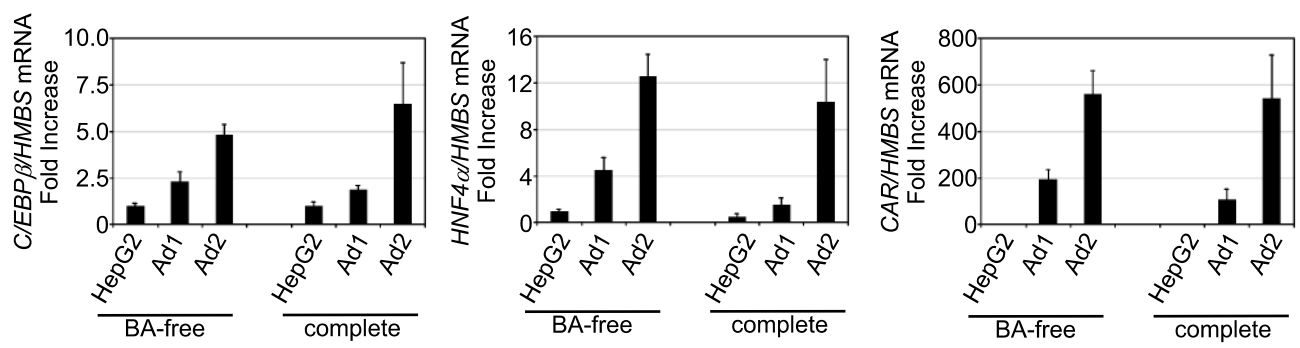

FIGURE S7

## **Text and Figure Legends for Supplementary**

### **Results**

OPLS-DA and PLS-DA models are calculated using the same method. The models do produce a different  $Q^2$  but this is due to the cross validation being calculated in a different way. The OPLS-DA model (1 correlated component + 2 orthogonal components) in figure 1 was tested for validity by analysing a PLS-DA model (3 latent variables) of the same data (Figure S1).

The 2D scores plots are shown for the correlated component and the two orthogonal components of the OPLS-DA model (Figure S2). The scores plots further demonstrate a clear separation in the metabolic profiles of the HepG2 and HepG2-Ad cell populations. They also demonstrate the variation within the cell type (HepG2 and HepG2-Ad) along the orthogonal component axis. Figure S2A shows two discrete groups of samples at the 72 hour time point in the HepG2-Ad cells, which could be due to variation in transfection efficiency. Figure S2B shows a clear time related effect in the HepG2-Ad cell population but not in the HepG2 cells.

### **Supplementary Figure legends**

**Figure S1. Permutation analysis to test the validity of the multivariate model.** The validation plot is the result of permuting the class (Y variable) of the PLS-DA model. The permutation test was carried out in SIMCA and is the result of 1000 permutations.

**Figure S2. Two dimensional scores plots of the OPLS-DA model describing the separation of the HepG2 and HepG2-Ad intracellular metabolic profiles.** The plots



are coloured by class (HepG2 or HepG2-Ad) and labeled according to time point (24 or 72 hours).  $R^2Y(\text{cum})=0.838$ ,  $Q^2(\text{cum})=0.671$ . **(A)** Scores plot of the correlated and first orthogonal components. **(B)** Scores plot of correlated and second orthogonal component.

**Figure S3. Representative  $^1\text{H}$  NMR spectra of selected metabolites.** Full resolution 600 MHz  $^1\text{H}$  CPMG spin-echo NMR spectra of aqueous intracellular metabolites. All spectra in the dataset are coloured grey except a single representative spectrum, which is coloured in black (*nb.* It is not necessarily the same spectrum coloured in black in each part of the figure (A-E)).

**Figure S4. Levels of conjugated and unconjugated primary bile acids in HepG2 media.** Data is expressed as pmol/plate assuming 1,5ml of media per plate.

**Figure S5. Levels of selected gene transcripts involved in bile acid metabolism in HepG2 and HepG2-Ad cells cultured in BA-free media.** HepG2 (diamonds) cells were infected with 24 (HepG2-Ad1; squares) or 96 (HepG2-Ad2; triangles) MOI of adenoviral vectors expressing C/EBP $\beta$ , HNF4 $\alpha$  and CAR (1:1:1). Total RNA was extracted at 24, 48 and 72 hours. mRNA levels of selected genes were normalized to hydroxymethylbilane synthase (*HMBS*) levels. Data correspond to the average  $\pm$  SD from four independent experiments in duplicate relative to control HepG2 cells at 24 hours. Horizontal dashed line corresponds to the average mRNA levels in human liver (n=5).

**Figure S6. A summary of the key intracellular metabolic pathways involved in cholesterol and bile acid biosynthesis.** Metabolites that are underlined were measured in the current study. Those that are underlined and shown in red were at lower levels in the HepG2-Ad cells, when compared to the HepG2 population. Four enzymes are shown in purple (malic enzyme, glucose-6-P dehydrogenase, ACSS2 & ATP-citrate lyase), which are important in either acetyl-CoA or NADPH production.

ACSS2=Acetyl-CoA synthetase 2. TCA=Tricarboxylic acid. HMG-CoA=3-hydroxy-3-methyl-glutaryl-CoA. Figure adapted from Lunt et al 2011 (Lunt and Vander Heiden 2011)

**Figure S7. Levels of C/EBP $\beta$ , HNF4 $\alpha$  and CAR in HepG2 and HepG2-Ad cells cultured in complete and BA-free media.** HepG2 cells were infected with 24 (Ad1) or 96 (Ad2) MOI of adenoviral vectors expressing C/EBP $\beta$ , HNF4 $\alpha$  and CAR (1:1:1). mRNA levels at 48 hours were normalized to hydroxymethylbilane synthase (*HMBS*) levels. Data correspond to the average  $\pm$  SD relative to control HepG2 cells at 24 hours.

## Supplementary Tables

**Table S1. Primers for qRT-PCR used in this study**

| Gene                             | Sequence                  | Product (bp) |
|----------------------------------|---------------------------|--------------|
| <i>CYP7A1-F</i>                  | CTGCTACCGAGTGATGTTTGAA    | 342          |
| <i>CYP7A1-R</i>                  | GAAAGTCGCTGGAATGGTGTT     |              |
| <i>CYP8B1-F</i>                  | ATACCCTGAAGATGTCCAGTGG    | 419          |
| <i>CYP8B1-R</i>                  | AAGCTCACTCTGTAGGATGC      |              |
| <i>CYP27A1-F</i>                 | GTGCCCCGCTCTTGAGCAA       | 124          |
| <i>CYP27A1-R</i>                 | CCTTCCGTGGTGAACGGCCC      |              |
| <i>AKR1D1-F</i>                  | TGTCCCAGAGATGGTCCGCCC     | 188          |
| <i>AKR1D1-R</i>                  | GGCACTCAACCTCCCAAGTGGC    |              |
| <i>HSD3B7-F</i>                  | AAGCAGTGCACAGGCACCCC      | 151          |
| <i>HSD3B7-R</i>                  | TACCTGGCCGCCATCAGGG       |              |
| <i>BAAT-F</i>                    | TGGCCTTGGCTTACCATAAC      | 197          |
| <i>BAAT-R</i>                    | CGTGGCTGTGACTTGCTTTA      |              |
| <i>FXR-F</i>                     | AACTTCCGTCTGGGCATTCTG     | 375          |
| <i>FXR-R</i>                     | GTGGGGTAACTTGTGGTCGT      |              |
| <i>LXR-F</i>                     | AAGCGGCAAGAGGAGGAACAG     | 240          |
| <i>LXR-R</i>                     | GCTCAGTGAAGTGGGCAAAGC     |              |
| <i>MRP2-F</i>                    | GCCGGTGGTCAGATTATCAT      | 292          |
| <i>MRP2-R</i>                    | GATCTTGGATTTCCGAAGCA      |              |
| <i>C/EBP<math>\beta</math>-F</i> | CTCGCAGGTCAAGAGCAAG       | 271          |
| <i>C/EBP<math>\beta</math>-R</i> | CTAGCAGTGGCCGGAGGAGGCGACC |              |
| <i>HNF4-F</i>                    | GCCTACCTCAAAGCCATCAT      | 255          |
| <i>HNF4-R</i>                    | GACCCTCCCAGCAGCATCTC      |              |
| <i>CAR-F</i>                     | TGCTGCCTCTGGTCACACACTT    | 385          |
| <i>CAR-R</i>                     | TCAATCTCATCTCTCTGGGTAAC   |              |
| <i>HMBS-F</i>                    | CGGAAGAAAACAGCCCAAAGA     | 272          |
| <i>HMBS-R</i>                    | TGAAGCCAGGAGGAAGCACAGT    |              |

**Table S2. The chemical shift regions integrated for confidently assigned metabolites in the NMR spectral data.**

| <b>Metabolite Assignment</b> | <b>Start ppm</b> | <b>End ppm</b> |
|------------------------------|------------------|----------------|
| leucine                      | 0.96             | 0.98           |
| valine                       | 1.03             | 1.06           |
| lactate                      | 1.31             | 1.33           |
| threonine                    | 1.33             | 1.335          |
| lactate                      | 1.335            | 1.34           |
| threonine                    | 1.34             | 1.36           |
| alanine                      | 1.46             | 1.51           |
| acetate                      | 1.91             | 1.93           |
| glutamate                    | 2.027            | 2.035          |
| glutamate                    | 2.035            | 2.05           |
| glutamate                    | 2.33             | 2.375          |
| succinate                    | 2.4              | 2.42           |
| aspartate                    | 2.78             | 2.815          |
| aspartate                    | 2.82             | 2.84           |
| glutathione*                 | 2.93             | 2.96           |
| creatine                     | 3.035            | 3.045          |
| Phosphocholine               | 3.22             | 3.23           |
| Glycerophosphocholine        | 3.23             | 3.24           |
| myo-inositol                 | 3.52             | 3.54           |
| myo-inositol                 | 3.54             | 3.557          |
| glycine                      | 3.557            | 3.575          |
| threonine                    | 3.585            | 3.6            |
| myo-inositol                 | 3.61             | 3.62           |
| creatine                     | 3.92             | 3.94           |
| myo-inositol                 | 4.065            | 4.085          |
| lactate                      | 4.09             | 4.1            |
| lactate*                     | 4.1              | 4.125          |
| lactate*                     | 4.125            | 4.13           |
| ATP/ADP/AMP*                 | 6.13             | 6.17           |
| ATP/ADP/AMP*                 | 8.26             | 8.29           |

\* = metabolites marked with an asterisk were overlapped with resonances that were unassigned to any metabolite/metabolites.

## Reference

Lunt, Sophia Y, and Matthew G Vander Heiden. 2011. "Aerobic Glycolysis: Meeting the Metabolic Requirements of Cell Proliferation." Annual Review of Cell and Developmental Biology 27: 441–64.
